# Supplementary material
Source: PubMed Central journal article supplement (PMC11558397)
Supplement: ajtr0016-5829-f8.pdf [file ajtr0016-5829-f8.pdf]

# Zhi Zhu Ma Ren pill relieves constipation

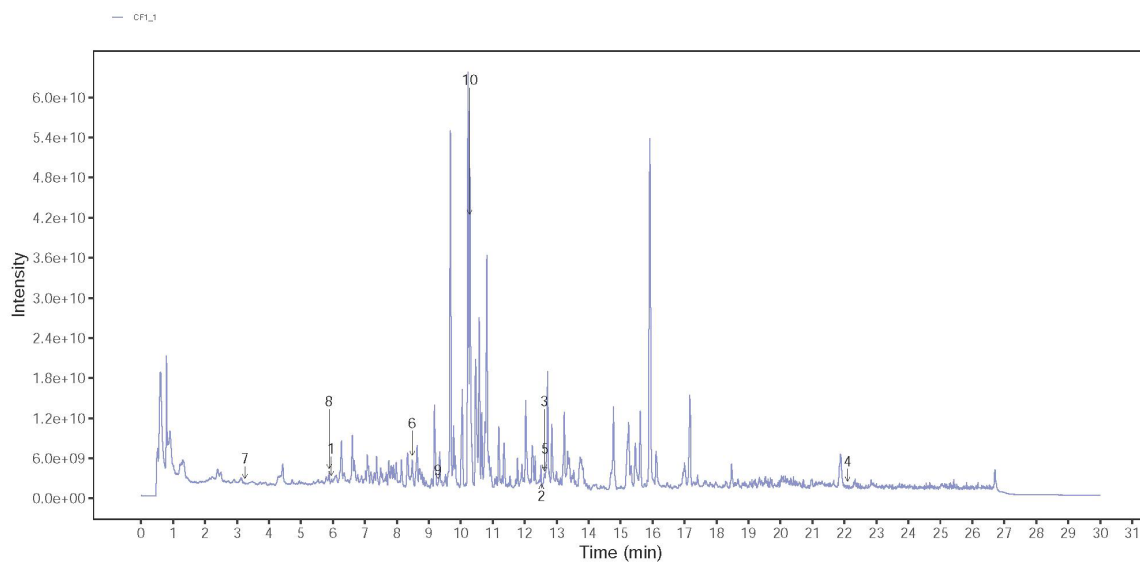

Figure S1. Positive ingredients of DR1.

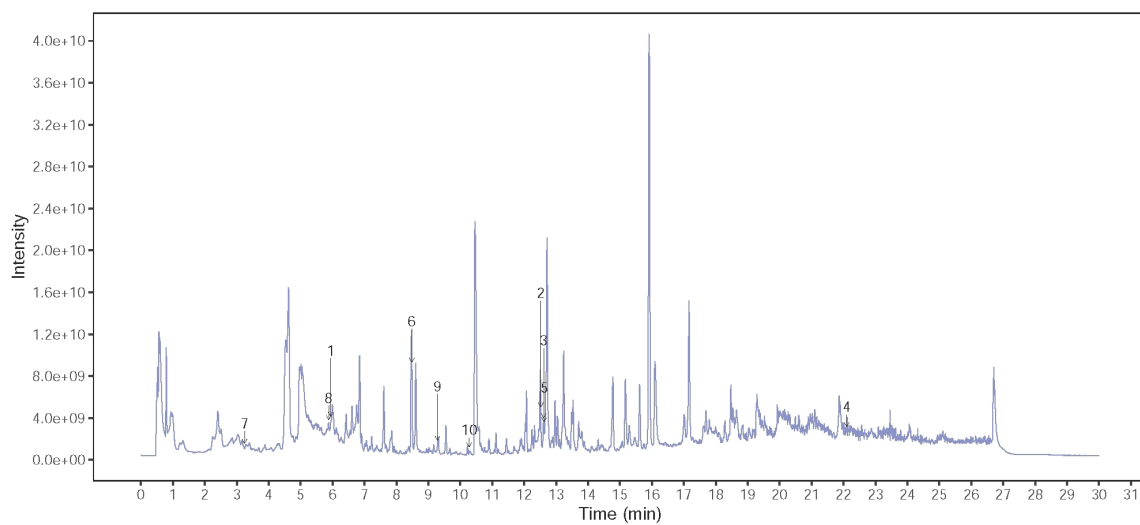

Figure S2. Positive ingredients of DR2.

# Zhi Zhu Ma Ren pill relieves constipation

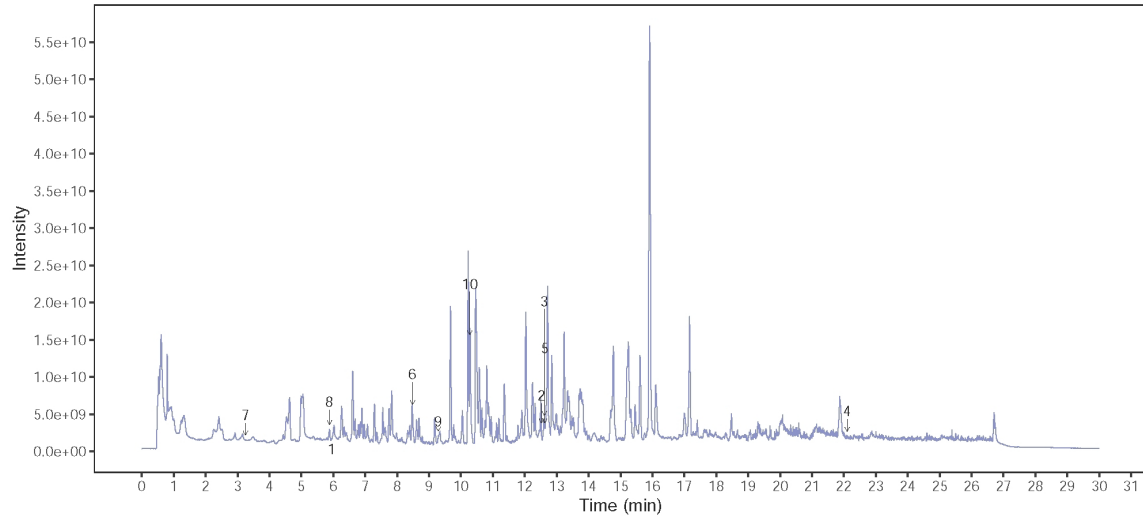

Figure S3. Positive ingredients of ZZMRP.

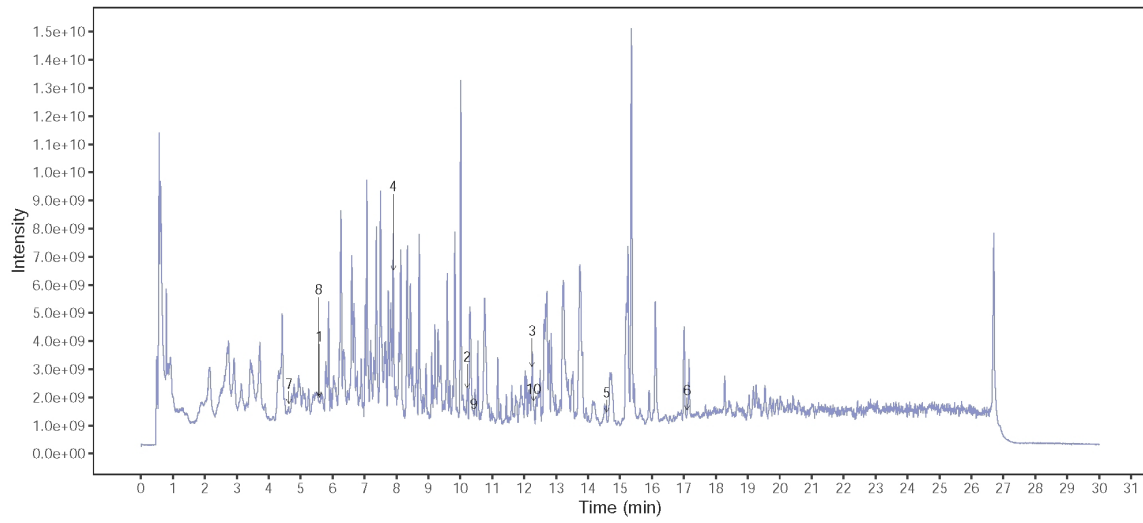

Figure S4. Negative ingredients of DR1.

# Zhi Zhu Ma Ren pill relieves constipation

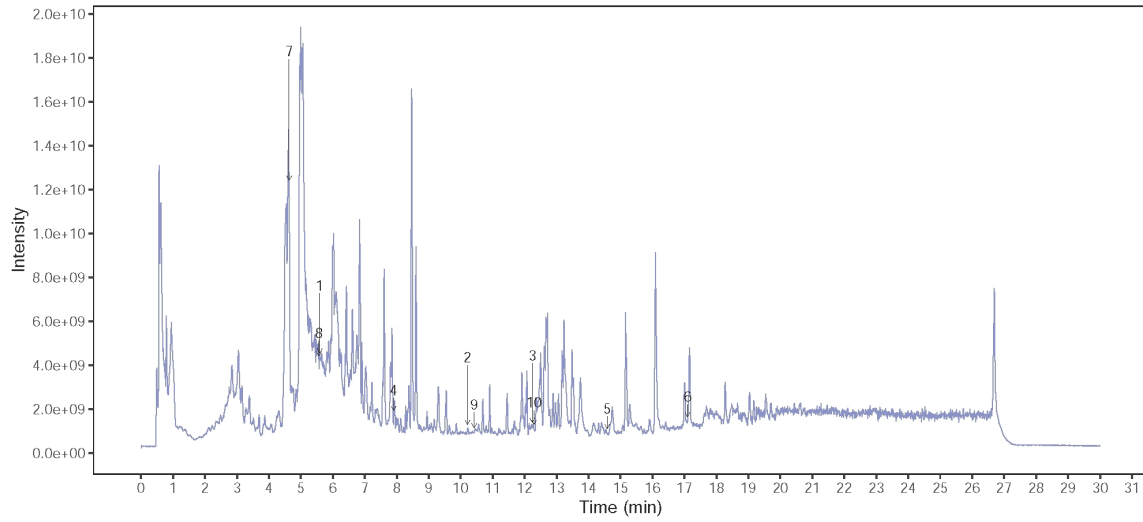

Figure S5. Negative ingredients of DR2.

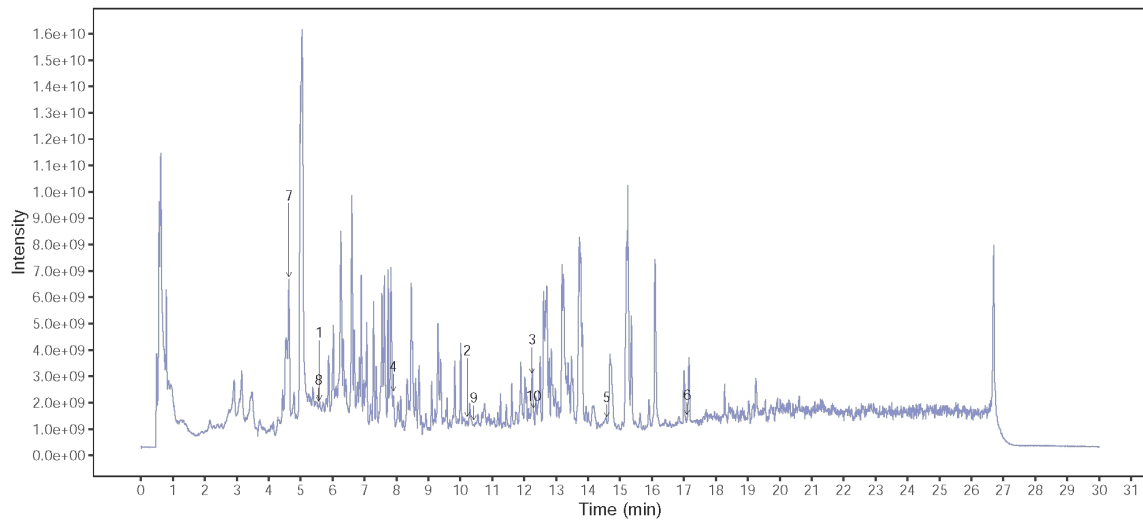

Figure S6. Positive ingredients of ZZMRP.

## Zhi Zhu Ma Ren pill relieves constipation

**Table S1.** The top 20 ingredients of DR1 DR2 and ZZMRP

| DR1                                                                                                       | DR2                                                                                                                                                                                   | ZZMRP                                                                                                                                                                             |
|-----------------------------------------------------------------------------------------------------------|---------------------------------------------------------------------------------------------------------------------------------------------------------------------------------------|-----------------------------------------------------------------------------------------------------------------------------------------------------------------------------------|
| Hexamethylquercetagetin                                                                                   | "[(1S,2S,3R,5R,6S,8S)-6-hydroxy-8-methyl-3-<br>{[(2S,3R,4S,5S,6R)-3,4,5-trihydroxy-6-(hydroxymethyl)<br>oxan-2-yl]oxy}-9,10-dioxatetracyclo[4.3.1.0.2]decan-2-<br>yl]methyl benzoate" | Hexamethylquercetagetin                                                                                                                                                           |
| Atractylenolide I                                                                                         | Eriodictyol 7-O-glucoside                                                                                                                                                             | Atractylenolide I                                                                                                                                                                 |
| LPC 16:0                                                                                                  | LPC 16:0                                                                                                                                                                              | "[(1S,2S,3R,5R,6S,8S)-6-hydroxy-8-methyl-3-<br>{[(2S,3R,4S,5S,6R)-3,4,5-trihydroxy-6-(hydroxymethyl)oxan-2-yl]<br>oxy}-9,10-dioxatetracyclo[4.3.1.0.2]decan-2-yl]methyl benzoate" |
| 1-Aminocyclohexanecarboxylic acid                                                                         | Asarylaldehyde                                                                                                                                                                        | LPC 16:0                                                                                                                                                                          |
| Isosinensetin                                                                                             | Citric acid                                                                                                                                                                           | Pterolactam                                                                                                                                                                       |
| Curzerene                                                                                                 | Erucamide                                                                                                                                                                             | 1-Aminocyclohexanecarboxylic acid                                                                                                                                                 |
| (+)-Nootkatone                                                                                            | (+)-Catechin hydrate                                                                                                                                                                  | Isosinensetin                                                                                                                                                                     |
| Pterolactam                                                                                               | 2-Hydroxy-3-(4-methoxyphenyl)propanoic acid                                                                                                                                           | L-Malic acid                                                                                                                                                                      |
| "2,3-Dihydro-6-methyl-1H-pyrrolizine-5-carboxaldehyde"                                                    | FA 18:1+10                                                                                                                                                                            | (+)-Nootkatone                                                                                                                                                                    |
| 6-Demethoxytangeretin                                                                                     | LINOLEATE                                                                                                                                                                             | Citric acid                                                                                                                                                                       |
| "5,7-dihydroxy-2-(4-hydroxyphenyl)-6,8-bis[3,4,5-trihydroxy-<br>6-(hydroxymethyl)oxan-2-yl]chromen-4-one" | Pterolactam                                                                                                                                                                           | Dicaffeoyl quinic acid                                                                                                                                                            |
| Dehydrophytosphingosine                                                                                   | Trigonelline HCl                                                                                                                                                                      | "17,18-Dichloro-3,13-diethyl-6-(hydroxymethyl)-9-phenylde-<br>cahydropyrrolo[1,2-d][1,4,7,10,13]pentaazacyclohexadecine-<br>1,4,7,11,14(8H)-pentone"                              |
| Naringenin-7-O-rutinoside                                                                                 | Choline chloride                                                                                                                                                                      | Naringenin-7-O-rutinoside                                                                                                                                                         |
| Citric acid                                                                                               | Arginine                                                                                                                                                                              | Erucamide                                                                                                                                                                         |
| L-Malic acid                                                                                              | "12,13-EODE"                                                                                                                                                                          | "2,3-Dihydro-6-methyl-1H-pyrrolizine-5-carboxaldehyde"                                                                                                                            |
| Naringin                                                                                                  | D-Gluconic acid                                                                                                                                                                       | 2-({[3-Phenyl-3-[(N-{2-[(1H-pyrrol-2-ylcarbonyl)amino]butanoyl]<br>seryl)amino]propanoyl]amino)butanoic acid                                                                      |
| Erucamide                                                                                                 | Pyrogallol                                                                                                                                                                            | Arginine                                                                                                                                                                          |
| Arginine                                                                                                  | "3,5-Dimethyl-2-propylpyrazine"                                                                                                                                                       | 6-Demethoxytangeretin                                                                                                                                                             |
| Dicaffeoyl quinic acid                                                                                    | "3,4-Dihydroxymandelic acid"                                                                                                                                                          | "5,7-dihydroxy-2-(4-hydroxyphenyl)-6,8-bis[3,4,5-trihydroxy-<br>6-(hydroxymethyl)oxan-2-yl]chromen-4-one"                                                                         |
| N-Methyltyramine                                                                                          | 8-Desoxygartanin                                                                                                                                                                      | Kaempferol                                                                                                                                                                        |
